# Supplementary material for: Permeability of boron- and nitrogen-doped graphene nanoflakes for protium/deuterium ions
Source: Royal Society of Chemistry journal article supplement (doi:10.1039/d1ra09398c), 2022-01-01
Supplement: d1ra09398c1.pdf [file d1ra09398c1.pdf]

## Supporting Information

### **Permeability of Boron and Nitrogen Doped Graphene Nanoflakes for Protium/Deuterium Ions**

Iram Gul<sup>a</sup>, Muhammad Yar<sup>a</sup>, Arsalan Ahmed<sup>a</sup>, Muhammad Ali Hashmi<sup>b</sup>, Khurshid Ayub<sup>a</sup>

<sup>a</sup> Department of Chemistry, COMSATS University, Abbottabad Campus, Abbottabad, KPK, Pakistan 22060

<sup>b</sup> Department of Chemistry, University of Educations, Attock Campus, Attock, Punjab, Pakistan 43600

Correspondence

Phone: +92-992-383591-6

Fax: +92-992-383441

khurshid@cuiatd.edu.pk

**Table S1.** Electronic properties of pure, H<sup>+</sup>@N-coronene , H<sup>+</sup>@nB-coronene and formation energies of each surface.

| H <sup>+</sup> permeability through pure and doped (B,N) coronene models | Charge on H <sup>+</sup> | HOMO   | LUMO  | E <sub>H-L</sub> (eV) | Formation energy per atom (kcal/mol) |
|--------------------------------------------------------------------------|--------------------------|--------|-------|-----------------------|--------------------------------------|
| Coronene                                                                 | 0.58                     | -11.05 | -4.98 | 6.07                  | -160.14                              |
| Pure <i>h</i> -BN                                                        | 0.54                     | -12.81 | -5.75 | 7.06                  | -142.43                              |
| B-Coronene                                                               | 0.50                     | -11.03 | -4.13 | 6.90                  | -157.02                              |
| 2B-Coronene                                                              | 0.56                     | -10.90 | -6.68 | 4.22                  | -153.61                              |
| 3B-Coronene                                                              | 0.45                     | -11.35 | -6.56 | 4.80                  | -150.38                              |
| 4B-Coronene                                                              | 0.37                     | -10.54 | -6.76 | 3.78                  | -146.48                              |
| 5B-Coronene                                                              | 0.33                     | -10.92 | -5.98 | 4.93                  | -142.69                              |
| 6B-Coronene                                                              | 0.31                     | -10.35 | -6.87 | 3.48                  | -137.91                              |
| N-Coronene                                                               | -0.23                    | -11.08 | -4.47 | 6.61                  | -158.13                              |
| 2N-Coronene                                                              | -0.69                    | -8.24  | -5.14 | 3.10                  | -155.91                              |
| 3N-Coronene                                                              | -0.81                    | -8.32  | -5.09 | 3.23                  | -153.75                              |
| 4N-Coronene                                                              | -0.40                    | -9.12  | -5.29 | 3.83                  | -150.57                              |
| 5N-Coronene                                                              | -0.46                    | -9.24  | -4.20 | 5.04                  | -147.45                              |
| 6N-Coronene                                                              | -0.60                    | -8.92  | -4.85 | 4.07                  | -144.24                              |
| BN-Coronene                                                              | 0.52                     | -10.76 | -5.07 | 5.68                  | -157.20                              |
| 2(BN)-coronene                                                           | 0.48                     | -10.51 | -5.23 | 5.28                  | -155.06                              |
| 3(BN)-Coronene                                                           | 0.53                     | -10.50 | -5.73 | 4.78                  | -153.64                              |
| 2B-DBC                                                                   | 0.47                     | -9.24  | -4.95 | 4.28                  | -169.99                              |
| 2B2N-DBC                                                                 | 0.48                     | 9.43   | -4.81 | 4.63                  | -162.79                              |
| nBN-DBC                                                                  | -0.13                    | -8.83  | -6.28 | 2.54                  | -170.71                              |
